# Supplementary material for: Alternaria Mycotoxins Analysis and Exposure Investigation in Ruminant Feeds
Source: MDPI journal article supplement (doi:10.3390/toxins15080495), 2023-08-04
Supplement: s1 [file s1]

Article

# *Alternaria* Mycotoxins Analysis and Exposure Investigation in Ruminant Feeds

Xin Mao <sup>1</sup>, Wanzhao Chen <sup>1</sup>, Huimin Wu <sup>1</sup>, Ying Shao <sup>2</sup>, Ya'ning Zhu <sup>2</sup>, Qingyong Guo <sup>1,\*</sup>, Yanshen Li <sup>2,\*</sup> and Lining Xia <sup>1,\*</sup>

<sup>1</sup> Xinjiang Key Laboratory of New Drug Study and Creation for Herbivorous Animals, College of Veterinary Medicine, Xinjiang Agricultural University, Urumqi 830052, China; maixin103820@126.com (X.M.); cwz752227@163.com (W.C.); m13899623260@163.com (H.W.)

<sup>2</sup> College of Life Science, Yantai University, Yantai 264000, China; shaoying@s.ytu.edu.cn (Y.S.); zhuyanling@s.ytu.edu.cn (Y.Z.)

\* Correspondence: dygqy@edu.xjau.cn (Q.G.); liyanshen@ytu.edu.cn (Y.L.); xln@edu.xjau.cn (L.X.); Tel.: +86-991-8762704 (Q.G.); +86-535-6902638 (Y.L.); +86-991-8763012 (L.X.)

## *LC-MS/MS parameters*

Optimized mass spectrum parameters were settled as follows: Ion Spray Voltage, 3.0 KV, Cone Gas Flow, 50 L/h, Desolvation Gas Flow, 700 L/h, Source Temperature, 150 °C, and Desolvation Temperature, 500 °C. Argon was used as collision gas and the pressure was at 0.8 mbar.

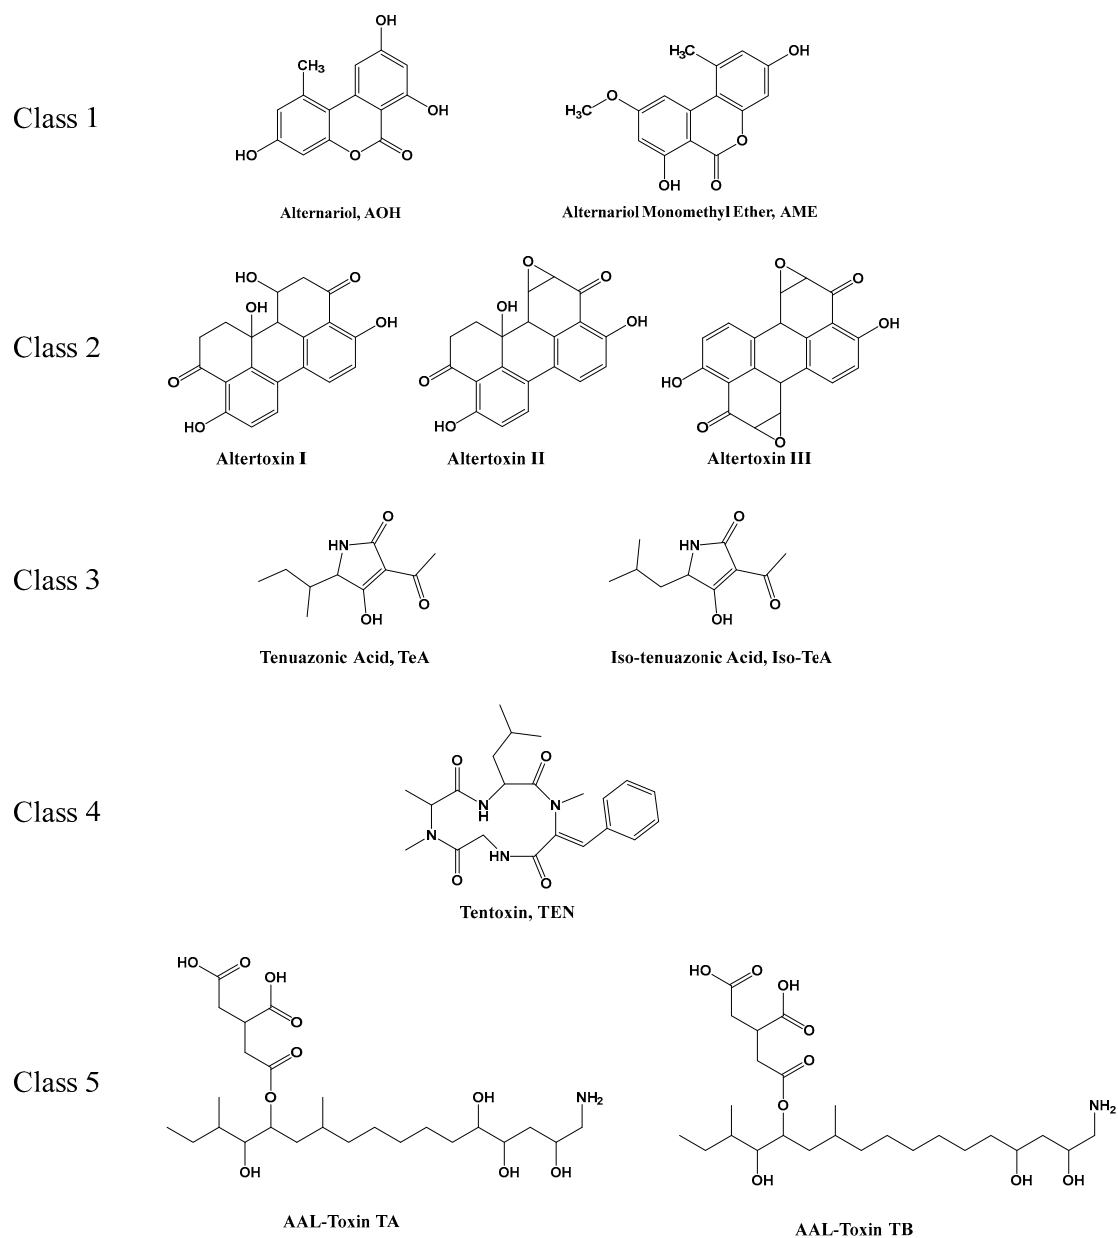

**Figure S1.** Chemical structures of the most common *Alternaria* toxins (Prepared by Chem Draw 18.0).

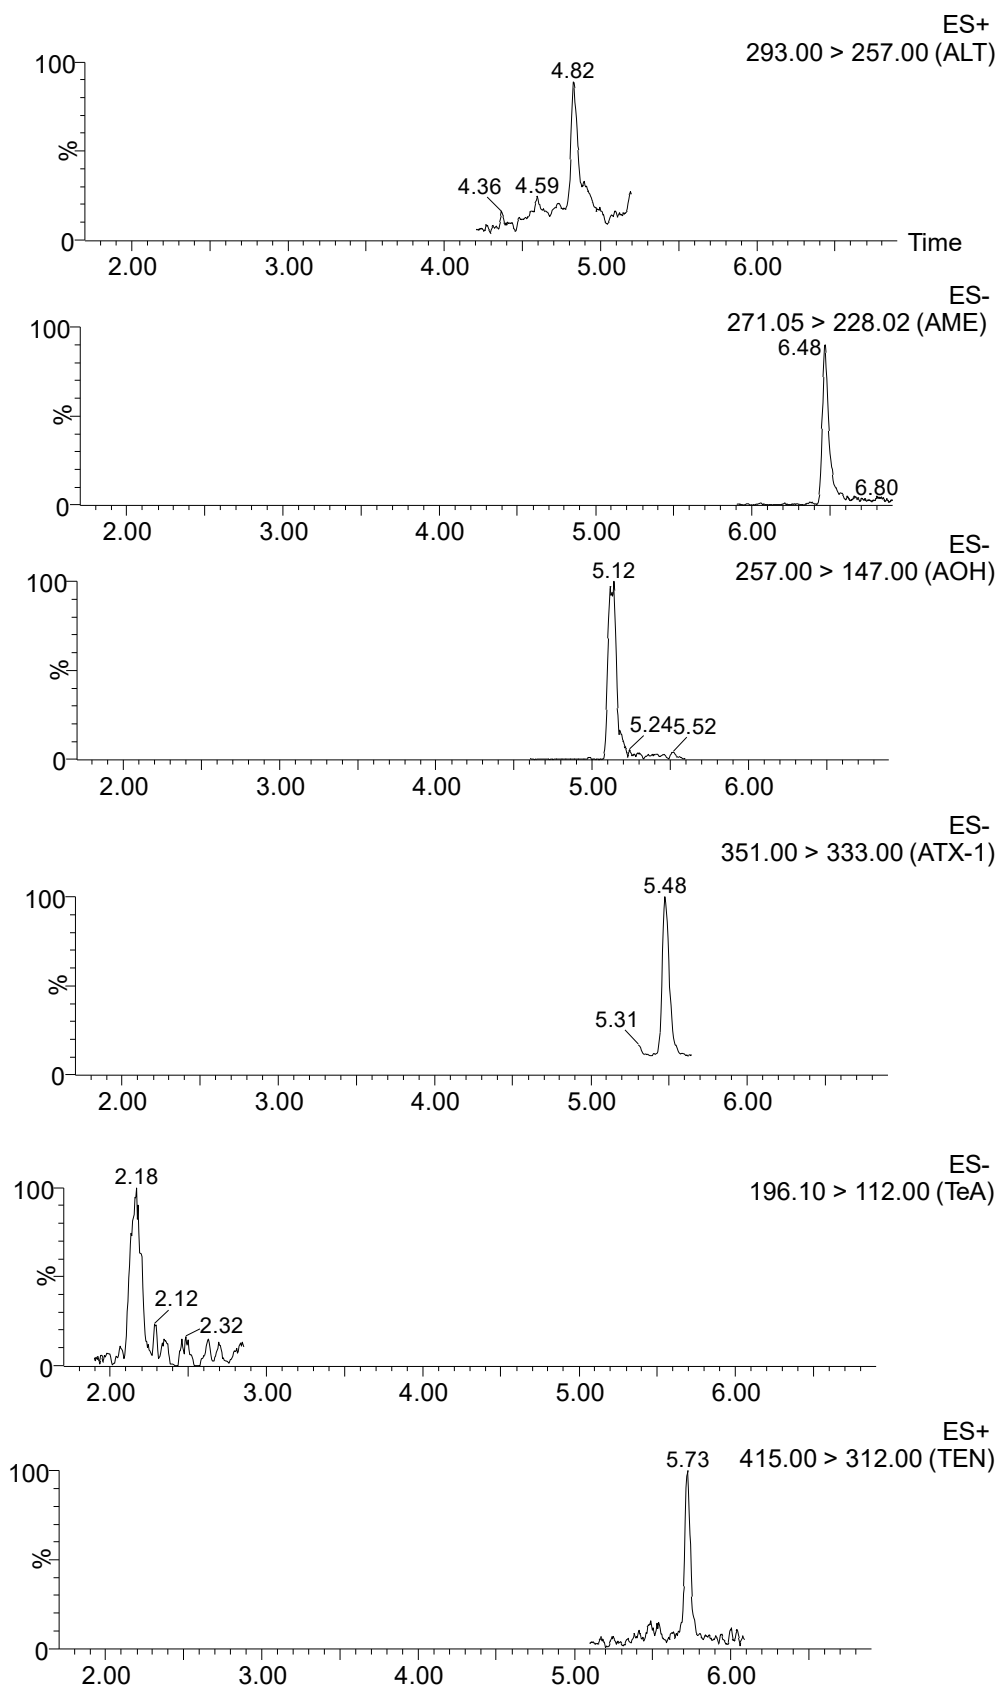

**Figure S2.** Chromatograms of each analyte at the lowest calibration curve level (2 ng/mL) (Prepared by Masslynx 4.2).

**Table S1.** Occurrence and levels of *Alternaria* toxins in ruminant feeds ( $n = 40$ ).

| Type of Feed | Sample No. | AME (µg/kg) | AOH (µg/kg) | ATX-I (µg/kg) | TeA (µg/kg) | TEN (µg/kg) |
|--------------|------------|-------------|-------------|---------------|-------------|-------------|
| Cattle Feeds | 1          | 39          | 22          | 4             | 56          | 4           |
|              | 2          | 238         | 196         | 9             | 295         | 39          |
|              | 3          | ND          | ND          | ND            | ND          | ND          |
|              | 4          | 196         | 178         | ND            | 276         | 10          |
|              | 5          | 208         | 189         | ND            | 206         | 22          |
|              | 6          | 164         | 149         | ND            | 150         | 6           |
|              | 7          | ND          | ND          | ND            | ND          | ND          |
|              | 8          | 155         | 141         | ND            | 195         | 18          |
|              | 9          | 85          | 133         | ND            | 165         | 25          |
|              | 10         | ND          | ND          | ND            | ND          | ND          |
|              | 11         | ND          | ND          | ND            | ND          | ND          |
|              | 12         | ND          | ND          | ND            | ND          | ND          |
|              | 13         | 92          | 84          | ND            | 175         | 8           |
|              | 14         | 219         | 199         | ND            | 177         | 8           |
|              | 15         | 209         | 190         | ND            | 182         | 10          |
|              | 16         | 203         | 185         | ND            | 233         | ND          |
|              | 17         | 109         | 99          | ND            | 265         | ND          |
|              | 18         | ND          | 162         | ND            | ND          | ND          |
|              | 19         | ND          | 151         | ND            | ND          | ND          |
|              | 20         | ND          | 156         | ND            | ND          | ND          |
| Sheep Feed   | 21         | 58          | 66          | 6             | 87          | 8           |
|              | 22         | 62          | 87          | 15            | 551         | 142         |
|              | 23         | 82          | 97          | 8             | 161         | 65          |
|              | 24         | 98          | 99          | ND            | 182         | 48          |
|              | 25         | 350         | 99          | ND            | 199         | 106         |
|              | 26         | ND          | ND          | ND            | ND          | ND          |
|              | 27         | ND          | ND          | ND            | 464         | ND          |
|              | 28         | 384         | 255         | ND            | 489         | 122         |
|              | 29         | ND          | ND          | ND            | ND          | ND          |
|              | 30         | 396         | 258         | ND            | 502         | 86          |
|              | 31         | 400         | 315         | ND            | 496         | ND          |
|              | 32         | 415         | 331         | ND            | 436         | ND          |
|              | 33         | 443         | 353         | ND            | ND          | ND          |
|              | 34         | 466         | 360         | ND            | ND          | ND          |
|              | 35         | 470         | 386         | ND            | ND          | ND          |
|              | 36         | 479         | ND          | ND            | ND          | ND          |
|              | 37         | 481         | ND          | ND            | ND          | ND          |
|              | 38         | ND          | ND          | ND            | ND          | ND          |
|              | 39         | ND          | ND          | ND            | ND          | ND          |
|              | 40         | 367         | 223         | ND            | ND          | 78          |

Each sample was run in three replicates.

Sample No. (1-20) stands for twenty different batches of cattle feed, while sample No. (21-40) stands for twenty different batches of sheep feed.

ND: not detected. Lower than LOD.

**Table S2.** Most optimized mass spectrum parameters for *Alternaria* mycotoxins.

| Parameter               | Value    |
|-------------------------|----------|
| Ion Spray Voltage       | 3.0 KV   |
| Cone Gas Flow           | 50 L/h   |
| Desolvation Gas Flow    | 700 L/h  |
| Source Temperature      | 150 °C   |
| Desolvation Temperature | 500 °C   |
| Collision Gas           | Argon    |
| Pressure                | 0.8 mbar |
